# Supplementary material
Source: ML conference proceedings conference paper supplement (https://openreview.net/forum?id=Bgla8Loqgq)
Supplement: supplementary_material [file attachment]

# Multiclass Classification for Hawkes Processes (Supplementary material)

Christophe Denis<sup>1</sup>

Charlotte Dion-Blanc<sup>2</sup>

Laure Sansonnet<sup>3</sup>

<sup>1</sup>LAMA, Université Gustave Eiffel, France

<sup>2</sup>LPSM, Sorbonne Université, France

<sup>3</sup>AgroParisTech, MIA Paris-Saclay, Université Paris-Saclay, France

In this supplementary material, we give first a technical result in Section 1. Then, Section 2 proposes the proofs of main results.

For the sake of simplicity we denote  $\mathcal{T}$  for  $\mathcal{T}_T$ . We use in the sequel the notation  $C$  which represents a positive constant that does not depend on  $n$ . Each time  $C$  is written in some equation, one should understand that there exists a positive constant such that the equation holds. Therefore, the values of  $C$  may change from line to line and even change in the same equation. When an index  $K$  appears,  $C_K$  represents a constant depending on  $K$  (and not on  $n$ ).

## 1 A TECHNICAL RESULT

Let us remind the reader that  $\mathcal{E}(g) = \mathcal{R}(g) - \mathcal{R}(g^*)$  for any classifier  $g \in \mathcal{G}$ .

**Proposition 1.1.** *For any classifier  $g \in \mathcal{G}$ , we have*

$$\mathcal{E}(g) = \mathbb{E} \left[ \sum_{i, k \neq i}^K |\pi_i^*(\mathcal{T}) - \pi_k^*(\mathcal{T})| \mathbb{1}_{\{g^*(\mathcal{T})=i, g(\mathcal{T})=k\}} \right].$$

*Proof.* Let  $g \in \mathcal{G}$ , we have:

$$\begin{aligned} \mathcal{E}(g) &= \mathbb{E} \left[ \mathbb{1}_{\{g(\mathcal{T}) \neq Y\}} - \mathbb{1}_{\{g^*(\mathcal{T}) \neq Y\}} \right] \\ &= \mathbb{E} \left[ \sum_{i=1}^K \sum_{j=1}^K \sum_{k=1}^K \pi_i^*(\mathcal{T}) \left( \mathbb{1}_{\{g(\mathcal{T}) \neq i\}} \right. \right. \\ &\quad \left. \left. - \mathbb{1}_{\{g^*(\mathcal{T}) \neq i\}} \right) \mathbb{1}_{\{g^*(\mathcal{T})=j\}} \mathbb{1}_{\{g(\mathcal{T})=k\}} \right] \\ &= \mathbb{E} \left[ \sum_{i=1}^K \sum_{k \neq i} \pi_i^*(\mathcal{T}) \mathbb{1}_{\{g(\mathcal{T})=k\}} \mathbb{1}_{\{g^*(\mathcal{T})=i\}} \right. \\ &\quad \left. - \sum_{k=1}^K \sum_{i \neq k} \pi_k^*(\mathcal{T}) \mathbb{1}_{\{g(\mathcal{T})=k\}} \mathbb{1}_{\{g^*(\mathcal{T})=i\}} \right] \\ &= \mathbb{E} \left[ \sum_{i, k \neq i}^K (\pi_i^*(\mathcal{T}) - \pi_k^*(\mathcal{T})) \mathbb{1}_{\{g(\mathcal{T})=k\}} \mathbb{1}_{\{g^*(\mathcal{T})=i\}} \right]. \end{aligned}$$

We deduce the result of Proposition 1.1 from the following observation on the event  $\{g^*(\mathcal{T}) = i\}$

$$\pi_i^*(\mathcal{T}) - \pi_k^*(\mathcal{T}) = |\pi_i^*(\mathcal{T}) - \pi_k^*(\mathcal{T})|.$$

□

## 2 PROOFS OF MAIN RESULTS

*Proof of Proposition 2.1.* We first denote for all  $k \in \mathcal{Y}$

$$\Phi_t^k := \frac{d\mathbb{P}_k |_{\mathcal{F}_t^N}}{d\mathbb{P}_0 |_{\mathcal{F}_t^N}},$$

with  $\mathcal{F}_T^N := \sigma(\mathcal{T}_T) = \sigma(N_t, 0 \leq t \leq T)$ . We classically obtain:

$$\log(\Phi_t^k) = - \int_0^t (\lambda_k^*(s) - 1) ds + \int_0^t \log(\lambda_k^*(s)) dN_s,$$

by writing *w.r.t.* a Poisson process measure of intensity 1 (see Chapter 13 of [Daley and Vere-Jones, 2003]). Thus,

for  $t \geq 0$ , we have the following equation for the mixture measure

$$d\mathbb{P}|_{\mathcal{F}_t^N} = \sum_{k=1}^K p_k d\mathbb{P}_k|_{\mathcal{F}_t^N} = \sum_{k=1}^K p_k \Phi_t^k d\mathbb{P}_0|_{\mathcal{F}_t^N}$$

and then

$$\frac{d\mathbb{P}_k|_{\mathcal{F}_t^N}}{d\mathbb{P}|_{\mathcal{F}_t^N}} = \frac{p_k \Phi_t^k d\mathbb{P}_0|_{\mathcal{F}_t^N}}{\sum_{j=1}^K p_j \Phi_t^j d\mathbb{P}_0|_{\mathcal{F}_t^N}} = \frac{\Phi_t^k}{\sum_{j=1}^K p_j \Phi_t^j}.$$

Finally, by using the definition of  $F_k^*$ , it comes

$$\pi_k^*(\mathcal{T}_T) = \frac{p_k^* e^{F_k^*}}{\sum_{j=1}^K p_j^* e^{F_j^*}},$$

that concludes the proof.  $\square$

*Proof of Proposition 3.4.* Let  $(\mathbf{p}, \mu, \mathbf{h})$  and  $(\mathbf{p}', \mu', \mathbf{h}')$  two tuples. We denote  $\pi$  and  $\pi'$  the associated elements in  $\Pi$  (see Equation (5)). We have that

$$\begin{aligned} \left\| \pi(\mathcal{T}) - \pi'(\mathcal{T}) \right\|_1 &\leq \left\| \pi(\mathcal{T}) - \boldsymbol{\pi}_{\mathbf{p}, \mu', \mathbf{h}'}(\mathcal{T}) \right\|_1 \\ &\quad + \left\| \boldsymbol{\pi}_{\mathbf{p}, \mu', \mathbf{h}'}(\mathcal{T}) - \pi'(\mathcal{T}) \right\|_1 \end{aligned} \quad (1)$$

Since for any  $k, j$  and  $(x_1, \dots, x_K)$ ,

$$\left| \frac{\partial \phi_k^{\mathbf{p}}(x_1, \dots, x_K)}{\partial p_j} \right| \leq \frac{1}{p_0},$$

we deduce by mean value inequality

$$\left\| \boldsymbol{\pi}_{\mathbf{p}, \mu', \mathbf{h}'}(\mathcal{T}) - \pi'(\mathcal{T}) \right\|_1 \leq \frac{K}{p_0} \left\| \mathbf{p} - \mathbf{p}' \right\|_1.$$

Besides for any  $k, j$  and  $\mathbf{p}$ ,

$$\left| \frac{\partial \phi_k^{\mathbf{p}}(x_1, \dots, x_K)}{\partial x_j} \right| \leq 1,$$

we also deduce

$$\begin{aligned} &\left\| \pi(\mathcal{T}) - \boldsymbol{\pi}_{\mathbf{p}, \mu', \mathbf{h}'}(\mathcal{T}) \right\|_1 \\ &\leq K \sum_{k=1}^K \left| F^{(\mu, h_k)}(\mathcal{T}) - F^{(\mu', h'_k)}(\mathcal{T}) \right|. \end{aligned}$$

Therefore, from Equation (1), we obtain

$$\begin{aligned} \mathbb{E} \left[ \left\| \pi(\mathcal{T}) - \pi'(\mathcal{T}) \right\|_1 \right] &\leq \frac{K}{p_0} \left\| \mathbf{p} - \mathbf{p}' \right\|_1 \\ &\quad + K \sum_{k=1}^K \mathbb{E} \left[ \left| F^{(\mu, h_k)}(\mathcal{T}) - F^{(\mu', h'_k)}(\mathcal{T}) \right| \right]. \end{aligned}$$

Hence, it remains to bound the second term in the *r.h.s.* of the above inequality. Using Cauchy-Schwarz inequality, for each  $k$ , we have that

$$\begin{aligned} &\mathbb{E} \left[ \left| F^{(\mu, h_k)}(\mathcal{T}) - F^{(\mu', h'_k)}(\mathcal{T}) \right| \right] \\ &= \mathbb{E} \left[ \left| \int_0^T \log \left( \frac{\lambda^{(\mu, h_k)}(t)}{\lambda^{(\mu', h'_k)}(t)} \right) dN_t \right. \right. \\ &\quad \left. \left. - \int_0^T \left( \lambda^{(\mu, h_k)}(t) - \lambda^{(\mu', h'_k)}(t) \right) dt \right| \right] \\ &\leq \mathbb{E} \left[ \left( \int_0^T \left| \log \left( \frac{\lambda^{(\mu, h_k)}(t)}{\lambda^{(\mu', h'_k)}(t)} \right) \right| dN_t \right)^2 \right]^{1/2} \\ &\quad + \mathbb{E} \left[ \int_0^T \left| \lambda^{(\mu, h_k)}(t) - \lambda^{(\mu', h'_k)}(t) \right| dt \right]. \end{aligned} \quad (2)$$

Now, we observe that

$$\left| \lambda^{(\mu, h_k)}(t) - \lambda^{(\mu', h'_k)}(t) \right| \leq |\mu' - \mu| + \|\mathbf{h} - \mathbf{h}'\|_{\infty, T} N_T,$$

where  $N_T = N_{[0, T]}$  denotes the number of jump times of the observed process lying on  $[0, T]$ . Therefore we deduce

$$\begin{aligned} &\mathbb{E} \left[ \int_0^T \left| \lambda^{(\mu, h_k)}(t) - \lambda^{(\mu', h'_k)}(t) \right| dt \right] \\ &\leq T \left( |\mu' - \mu| + \|\mathbf{h} - \mathbf{h}'\|_{\infty, T} \mathbb{E}[N_T] \right). \end{aligned} \quad (3)$$

Now, we bound the first term in the *r.h.s.* of Equation (2). Using that  $x \mapsto \log(1+x)$  is Lipschitz we obtain:

$$\begin{aligned} &\left| \log \left( \frac{\lambda^{(\mu, h_k)}(t)}{\lambda^{(\mu', h'_k)}(t)} \right) \right| \leq \left| \log \left( \frac{\mu}{\mu'} \right) \right| \\ &\quad + \left| \frac{\lambda^{(\mu, h_k)}(t)}{\mu'} - \frac{\lambda^{(\mu', h'_k)}(t)}{\mu} \right| \\ &\leq \frac{1}{\mu_0} \left| \mu - \mu' \right| + \frac{1}{\mu_0^2} \left| \mu \lambda^{(\mu, h_k)}(t) - \mu' \lambda^{(\mu', h'_k)}(t) \right| \\ &\leq \frac{1}{\mu_0} \left| \mu - \mu' \right| + \frac{1}{\mu_0^2} \left( \left| \mu - \mu' \right| \lambda^{(\mu', h'_k)}(t) \right. \\ &\quad \left. + \mu_1 \left| \lambda^{(\mu, h_k)}(t) - \lambda^{(\mu', h'_k)}(t) \right| \right) \\ &\leq \frac{1}{\mu_0} \left| \mu - \mu' \right| + \frac{1}{\mu_0^2} \left( \left| \mu - \mu' \right| \lambda^{(\mu', h'_k)}(t) \right. \\ &\quad \left. + \mu_1 \left( \left| \mu' - \mu \right| + \|\mathbf{h} - \mathbf{h}'\|_{\infty, T} N_T \right) \right). \end{aligned} \quad (4)$$

Using Doob's decomposition, we get

$$\begin{aligned} & \mathbb{E} \left[ \left( \int_0^T \left| \log \left( \frac{\lambda(\mu, h_k)(t)}{\lambda(\mu', h'_k)(t)} \right) \right| dN_t \right)^2 \right] = \\ & \mathbb{E} \left[ \int_0^T \log^2 \left( \frac{\lambda(\mu, h_k)(t)}{\lambda(\mu', h'_k)(t)} \right) \lambda_Y^*(t) dt \right] \\ & + \mathbb{E} \left[ \left( \int_0^T \left| \log \left( \frac{\lambda(\mu, h_k)(t)}{\lambda(\mu', h'_k)(t)} \right) \right| \lambda_Y^*(t) dt \right)^2 \right]. \end{aligned} \quad (5)$$

Using that  $\mathbb{E} \left[ (\lambda_Y^*(t))^2 \right] < \infty$ , the first term in the r.h.s. in Equation (5) can be bounded as follows

$$\begin{aligned} & \mathbb{E} \left[ \int_0^T \log^2 \left( \frac{\lambda(\mu, h_k)(t)}{\lambda(\mu', h'_k)(t)} \right) \lambda_Y^*(t) dt \right] \\ & \leq \int_0^T \mathbb{E} \left[ \log^4 \left( \frac{\lambda(\mu, h_k)(t)}{\lambda(\mu', h'_k)(t)} \right) \right]^{1/2} \mathbb{E} \left[ (\lambda_Y^*(t))^2 \right]^{1/2} dt \\ & \leq CT \sup_{t \in [0, T]} \mathbb{E} \left[ \log^4 \left( \frac{\lambda(\mu, h_k)(t)}{\lambda(\mu', h'_k)(t)} \right) \right]^{1/2}. \end{aligned}$$

Similarly, we obtain:

$$\begin{aligned} & \mathbb{E} \left[ \left( \int_0^T \left| \log \left( \frac{\lambda(\mu, h_k)(t)}{\lambda(\mu', h'_k)(t)} \right) \right| \lambda_Y^*(t) dt \right)^2 \right] \\ & \leq T \mathbb{E} \left[ \int_0^T \log^2 \left( \frac{\lambda(\mu, h_k)(t)}{\lambda(\mu', h'_k)(t)} \right) (\lambda_Y^*(t))^2 dt \right] \\ & \leq CT^2 \sup_{t \in [0, T]} \mathbb{E} \left[ \log^4 \left( \frac{\lambda(\mu, h_k)(t)}{\lambda(\mu', h'_k)(t)} \right) \right]^{1/2}. \end{aligned}$$

Then, by Assumption 3.1, we get

$$\begin{aligned} & \mathbb{E} \left[ \left( \int_0^T \left| \log \left( \frac{\lambda(\mu, h_k)(t)}{\lambda(\mu', h'_k)(t)} \right) \right| dN_t \right)^2 \right] \\ & \leq C \left( |\mu - \mu'|^2 + \|\mathbf{h} - \mathbf{h}'\|_{\infty, T}^2 \right) \\ & \leq C \left( 2\mu_1 |\mu - \mu'| + \|\mathbf{h} - \mathbf{h}'\|_{\infty, T}^2 \right), \end{aligned}$$

where  $C$  is constant which depends on  $\mu_0, \mu_1, \mathbf{h}^*, A_1$ , and  $T$ . Finally, combining the above equation, Equations (3) and (2) yields the desired result.  $\square$

*Proof of Corollary 3.5.* Let  $\pi \in \Pi$ . We recall that

$$g_\pi(\mathcal{T}) = \operatorname{argmax}_{k \in \mathcal{Y}} \pi^k(\mathcal{T})$$

for  $h \in \mathcal{H}$ . By Proposition 1.1 we then get

$$\begin{aligned} 0 & \leq \mathcal{E}(g_\pi) \\ & = \mathbb{E} \left[ \sum_{i, k \neq i}^K |\pi_i^*(\mathcal{T}) - \pi_k^*(\mathcal{T})| \mathbb{1}_{\{g_\pi(\mathcal{T})=k\}} \mathbb{1}_{\{g^*(\mathcal{T})=i\}} \right] \\ & \leq 2 \mathbb{E} \left[ \max_{k \in \mathcal{Y}} |\pi^k(\mathcal{T}) - \pi_k^*(\mathcal{T})| \mathbb{1}_{\{g_\pi(\mathcal{T}) \neq g^*(\mathcal{T})\}} \right] \\ & \leq 2 \sum_{k=1}^K \mathbb{E} [|\pi^k(\mathcal{T}) - \pi_k^*(\mathcal{T})|]. \end{aligned}$$

Finally, applying Proposition 3.4, we obtain the desired result.  $\square$

*Proof of Theorem 4.2.* Let us remind the reader that  $\hat{\mathbf{p}} = (\hat{p}_k)_{k=1, \dots, K}$  with  $\hat{p}_k = \frac{1}{n} \sum_{i=1}^n \mathbb{1}_{Y_i=k}$ . We consider the following set  $\mathcal{A} = \{\hat{\mathbf{p}} : \min(\hat{\mathbf{p}}) \geq \frac{p_0}{2}\}$ , where  $p_0$  is defined in Assumption 3.3.

On the one hand, note that on  $\mathcal{A}^c$  we have

$$|\min(\mathbf{p}^*) - \min(\hat{\mathbf{p}})| \geq \frac{p_0}{2},$$

which implies that there exists  $k \in \mathcal{Y}$  s.t.  $|p_k^* - \hat{p}_k| \geq \frac{p_0}{2}$ . Thus, by using Hoeffding's inequality we get

$$\begin{aligned} \mathbb{P}(\mathcal{A}^c) & \leq \sum_{k=1}^K \mathbb{P} \left( |p_k^* - \hat{p}_k| \geq \frac{p_0}{2} \right) \\ & \leq 2K e^{-np_0^2/2}. \end{aligned} \quad (6)$$

On the other hand, we focus on what happens on the event  $\mathcal{A}$ . First, we define

$$\tilde{\mathbf{f}} = \mathbf{f}_{(\hat{\mathbf{p}}, \tilde{\mu}, \tilde{\mathbf{h}})} = \operatorname{argmin}_{\mathbf{f} \in \tilde{\mathcal{F}}} \mathcal{R}(\mathbf{f}), \quad (7)$$

and then consider the following decomposition

$$\begin{aligned} \mathcal{R}(\hat{\mathbf{f}}) - \mathcal{R}(\mathbf{f}^*) & = (\mathcal{R}(\hat{\mathbf{f}}) - \mathcal{R}(\tilde{\mathbf{f}})) + (\mathcal{R}(\tilde{\mathbf{f}}) - \mathcal{R}(\mathbf{f}^*)) \\ & =: T_1 + T_2. \end{aligned}$$

By Equation (7), we have that

$$\begin{aligned} T_2 & = \mathcal{R}(\tilde{\mathbf{f}}) - \mathcal{R}(\mathbf{f}^*) \\ & = \mathcal{R}(\mathbf{f}_{(\hat{\mathbf{p}}, \tilde{\mu}, \tilde{\mathbf{h}})}) - \mathcal{R}(\mathbf{f}_{(\hat{\mathbf{p}}, \mu^*, \mathbf{h}^*)}) \\ & \quad + \mathcal{R}(\mathbf{f}_{(\hat{\mathbf{p}}, \mu^*, \mathbf{h}^*)}) - \mathcal{R}(\mathbf{f}_{(\mathbf{p}^*, \mu^*, \mathbf{h}^*)}) \\ & \leq \mathcal{R}(\mathbf{f}_{(\hat{\mathbf{p}}, \mu^*, \mathbf{h}^*)}) - \mathcal{R}(\mathbf{f}_{(\mathbf{p}^*, \mu^*, \mathbf{h}^*)}). \end{aligned}$$

Therefore, on  $\mathcal{A}$ , we deduce from the mean value inequality that

$$T_2 \leq C_K \sum_{k=1}^K |\hat{p}_k - p_k^*|^2, \quad (8)$$

where  $C_K$  is a constant depending on  $K$ . For establishing an upper bound for  $T_1$ , we first recall the definition (8) of the empirical risk minimizer over  $\widehat{\mathcal{F}}$ :

$$\widehat{\mathbf{f}} \in \operatorname{argmin}_{\mathbf{f} \in \widehat{\mathcal{F}}} \widehat{\mathcal{R}}(\mathbf{f}),$$

with

$$\widehat{\mathcal{R}}(\mathbf{f}) = \frac{1}{n} \sum_{i=1}^n \sum_{k=1}^K (Z_k^i - \mathbf{f}^k(\mathcal{T}^i))^2.$$

Besides, let us introduce the set of parameters

$$\mathcal{S} = \{(\mathbf{p}, \mu, \mathbf{h}) : \mathbf{p} \in \mathcal{P}_{p_0/2}, \mu \in [\mu_0, \mu_1], \mathbf{h} \in \mathcal{H}_A^K\}.$$

Then, on  $\mathcal{A}$ , we have by definition (7) of  $\tilde{f}$ ,

$$\begin{aligned} T_1 &= \mathcal{R}(\widehat{\mathbf{f}}) - \mathcal{R}(\tilde{\mathbf{f}}) \\ &= \mathcal{R}(\widehat{\mathbf{f}}) - \widehat{\mathcal{R}}(\widehat{\mathbf{f}}) + \widehat{\mathcal{R}}(\widehat{\mathbf{f}}) - \mathcal{R}(\tilde{\mathbf{f}}) \\ &\leq \mathcal{R}(\widehat{\mathbf{f}}) - \widehat{\mathcal{R}}(\widehat{\mathbf{f}}) + \widehat{\mathcal{R}}(\tilde{\mathbf{f}}) - \mathcal{R}(\tilde{\mathbf{f}}) \\ &\leq 2 \sup_{(\mathbf{p}, \mu, \mathbf{h}) \in \mathcal{S}} |\mathcal{R}(\mathbf{f}_{(\mathbf{p}, \mu, \mathbf{h})}) - \widehat{\mathcal{R}}(\mathbf{f}_{(\mathbf{p}, \mu, \mathbf{h})})|. \quad (9) \end{aligned}$$

By combining (8) and (9), we obtain

$$\begin{aligned} &\mathbb{E}[\mathcal{R}(\widehat{\mathbf{f}}) - \mathcal{R}(\mathbf{f}^*)] \\ &\leq 2\mathbb{E} \left[ \sup_{(\mathbf{p}, \mu, \mathbf{h}) \in \mathcal{S}} |\mathcal{R}(\mathbf{f}_{(\mathbf{p}, \mu, \mathbf{h})}) - \widehat{\mathcal{R}}(\mathbf{f}_{(\mathbf{p}, \mu, \mathbf{h})})| \mathbb{1}_{\mathcal{A}} \right] \\ &\quad + \mathbb{E} \left[ C_K \sum_{k=1}^K |\widehat{p}_k - p_k^*|^2 \mathbb{1}_{\mathcal{A}} \right] \\ &\quad + \mathbb{E} \left[ (\mathcal{R}(\widehat{\mathbf{f}}) - \mathcal{R}(\mathbf{f}^*)) \mathbb{1}_{\mathcal{A}^c} \right]. \end{aligned}$$

Since for  $k \in \mathcal{Y}$ ,  $\mathbb{E}[|\widehat{p}_k - p_k^*|^2] \leq C/n$  with  $C$  an absolute constant and  $\widehat{\mathbf{f}}$  and  $\mathbf{f}^*$  are bounded, by using Equation (6), we obtain:

$$\begin{aligned} &\mathbb{E}[\mathcal{R}(\widehat{\mathbf{f}}) - \mathcal{R}(\mathbf{f}^*)] \\ &\leq 2\mathbb{E} \left[ \sup_{(\mathbf{p}, \mu, \mathbf{h}) \in \mathcal{S}} |\mathcal{R}(\mathbf{f}_{(\mathbf{p}, \mu, \mathbf{h})}) - \widehat{\mathcal{R}}(\mathbf{f}_{(\mathbf{p}, \mu, \mathbf{h})})| \right] \\ &\quad + C_K \left( \frac{1}{n} + \exp\left(-\frac{np_0^2}{2}\right) \right). \quad (10) \end{aligned}$$

It remains to control the first term in the right hand side of the above inequality. By Assumption 4.1 with  $\varepsilon = 1/n$  and since  $\mathbf{p} \in \mathcal{P}_{p_0/2}$ , and  $\mu \in [\mu_0, \mu_1]$ , there exists a finite set  $\mathcal{S}_n \subset \mathcal{S}$  such that for each  $(\mathbf{p}, \mu, \mathbf{h}) \in \mathcal{S}$ , there exists  $(\mathbf{p}_n, \mu_n, \mathbf{h}_n) \in \mathcal{S}_n$  satisfying

$$\|\mathbf{p}_n - \mathbf{p}\|_1 \leq \frac{C_K}{n}, \quad |\mu_n - \mu| \leq \frac{1}{n}, \quad \|\mathbf{h}_n - \mathbf{h}\|_{\infty, T} \leq \frac{1}{n}.$$

Moreover, we have  $\log(\operatorname{card}(\mathcal{S}_n)) \leq C_K \log(n^d)$ . For  $(\mathbf{p}, \mu, \mathbf{h}) \in \mathcal{S}$ , let us denote  $\mathbf{f} = \mathbf{f}_{(\mathbf{p}, \mu, \mathbf{h})}$  and  $\mathbf{f}_n =$

$\mathbf{f}_{(\mathbf{p}_n, \mu_n, \mathbf{h}_n)}$  the corresponding element of  $\mathcal{S}_n$ . Then, we have

$$\begin{aligned} |\mathcal{R}(\mathbf{f}) - \widehat{\mathcal{R}}(\mathbf{f})| &\leq |\mathcal{R}(\mathbf{f}) - \mathcal{R}(\mathbf{f}_n)| \\ &\quad + |\mathcal{R}(\mathbf{f}_n) - \widehat{\mathcal{R}}(\mathbf{f}_n)| + |\widehat{\mathcal{R}}(\mathbf{f}_n) - \widehat{\mathcal{R}}(\mathbf{f})|. \end{aligned}$$

Moreover, since  $\mathbf{f}$  and  $\mathbf{f}_n$  are bounded, we deduce that by denoting  $\pi_n := \boldsymbol{\pi}_{\mathbf{p}_n, \mu_n, \mathbf{h}_n}$

$$\mathbb{E}[|\mathcal{R}(\mathbf{f}) - \mathcal{R}(\mathbf{f}_n)|] \leq \mathbb{E}[\|\pi(\mathcal{T}) - \pi_n(\mathcal{T})\|_1] \leq \frac{C}{n},$$

where the last inequality is obtained with the same arguments as in the proof of Proposition 3.4. In the same way, we also get

$$\mathbb{E}[|\widehat{\mathcal{R}}(\mathbf{f}) - \widehat{\mathcal{R}}(\mathbf{f}_n)|] \leq \frac{C}{n}.$$

Finally, from the above inequalities, we obtain that

$$\begin{aligned} &\mathbb{E} \left[ \sup_{\mathcal{S}} |\mathcal{R}(\mathbf{f}) - \widehat{\mathcal{R}}(\mathbf{f})| \right] \\ &\leq \frac{2C}{n} + \mathbb{E} \left[ \max_{\mathcal{S}_n} |\mathcal{R}(\mathbf{f}) - \widehat{\mathcal{R}}(\mathbf{f})| \right]. \end{aligned}$$

Moreover, by Hoeffding's inequality, it comes for  $t \geq 0$ ,

$$\begin{aligned} &\mathbb{P} \left( \max_{\mathcal{S}_n} |\widehat{\mathcal{R}}(\mathbf{f}) - \mathcal{R}(\mathbf{f})| \geq t \right) \\ &\leq \min(1, 2 \operatorname{card}(\mathcal{S}_n) \exp(-2nt^2)). \end{aligned}$$

Integrating the previous equation leads to

$$\begin{aligned} &\mathbb{E} \left[ \max_{\mathcal{S}_n} |\widehat{\mathcal{R}}(\mathbf{f}) - \mathcal{R}(\mathbf{f})| \right] \\ &\leq \int_0^\infty \min(1, \exp(\log(2 \operatorname{card}(\mathcal{S}_n)) - 2nt^2)) dt \\ &\leq \int_0^\infty \exp(-(2nt^2 - \log(2 \operatorname{card}(\mathcal{S}_n)))_+) dt \\ &\leq \sqrt{\frac{\log(2 \operatorname{card}(\mathcal{S}_n))}{2n}} + \frac{\sqrt{\pi}}{2\sqrt{2n}}. \end{aligned}$$

Finally, since there are at least two elements in  $\mathcal{S}_n$ , combining the above inequality and Equation (10) yields

$$\mathbb{E}[\mathcal{R}(\widehat{\mathbf{f}}) - \mathcal{R}(\mathbf{f}^*)] \leq \sqrt{\frac{\log(2 \operatorname{card}(\mathcal{S}_n))}{2n}} + \frac{C}{n},$$

which concludes the proof.  $\square$

*Proof of Theorem 4.3.* Let us denote

$$\Delta_n := \sum_{k=1}^K (\widehat{p}_k - p_k^*)^2,$$

where based on  $\mathcal{D}_{n_1} := \mathcal{D}_n^1$ ,  $\hat{p}_k = \frac{1}{n_1} \sum_{i=1}^{n_1} \mathbb{1}_{Y_i=k}$ . Note that  $\Delta_n$  is independent from  $\mathcal{D}_{n_2} := \mathcal{D}_n^2$ . Recall that  $n$  is assumed to be even and  $n_1 = n_2 = n/2$ .

Let us work again on the set  $\mathcal{A} = \{\hat{\mathbf{p}} : \min(\hat{\mathbf{p}}) \geq \frac{p_0}{2}\}$ . As in proof of Theorem 4.2, we can write

$$\mathcal{R}(\hat{\mathbf{f}}) - \mathcal{R}(\mathbf{f}^*) \leq \mathcal{R}(\hat{\mathbf{f}}) - \mathcal{R}(\tilde{\mathbf{f}}) + \mathcal{R}(\tilde{\mathbf{f}}) - \mathcal{R}(\mathbf{f}^*),$$

and from Equation (8), the second term in the right hand side of the above inequality is bounded by  $C_K \Delta_n$ .

Let us denote

$$D_{\mathbf{f}} := \mathcal{R}(\mathbf{f}) - \mathcal{R}(\tilde{\mathbf{f}})$$

and

$$\widehat{D}_{\mathbf{f}} := \widehat{\mathcal{R}}(\mathbf{f}) - \widehat{\mathcal{R}}(\tilde{\mathbf{f}}).$$

Furthermore, let us introduce

$$\tilde{\mathcal{S}} = \{(\mu, \mathbf{h}) : \mu \in [\mu_0, \mu_1], \mathbf{h} \in \mathcal{H}_A^K\}.$$

By Assumption 4.1, there exists a subset  $\tilde{\mathcal{S}}_n \subset \tilde{\mathcal{S}}$  with  $\log(\text{card}(\tilde{\mathcal{S}}_n)) \leq C \log(n^d)$ , such that for each  $(\mu, \mathbf{h}) \in \tilde{\mathcal{S}}$ , there exists  $(\mu_n, \mathbf{h}_n) \in \tilde{\mathcal{S}}_n$  satisfying

$$|\mu_n - \mu| \leq \frac{1}{n} \quad \text{and} \quad \|\mathbf{h}_n - \mathbf{h}\|_{\infty, T} \leq \frac{1}{n}.$$

For  $(\mu, \mathbf{h}) \in \tilde{\mathcal{S}}$ , let us denote  $\mathbf{f} = \mathbf{f}_{(\hat{\mathbf{p}}, \mu, \mathbf{h})}$  and  $\mathbf{f}_n = \mathbf{f}_{(\hat{\mathbf{p}}, \mu_n, \mathbf{h}_n)}$  the associated element of  $\tilde{\mathcal{S}}_n$ . Then, the following decomposition holds

$$\begin{aligned} D_{\hat{\mathbf{f}}} &\leq D_{\tilde{\mathbf{f}}} - 2\widehat{D}_{\tilde{\mathbf{f}}} \\ &= (D_{\tilde{\mathbf{f}}} - D_{\mathbf{f}_n}) + (2\widehat{D}_{\mathbf{f}_n} - 2\widehat{D}_{\tilde{\mathbf{f}}}) \\ &\quad + (D_{\mathbf{f}_n} - 2\widehat{D}_{\mathbf{f}_n}) \\ &=: T_1 + T_2 + T_3. \end{aligned}$$

As in proof of Theorem 4.2 and using same arguments as in proof of Proposition 3.4, we have

$$\mathbb{E}[T_i] \leq \frac{C}{n}, \quad \text{for } i = 1, 2.$$

Besides,

$$T_3 \leq \max_{\tilde{\mathcal{S}}_n} (D_{\mathbf{f}} - 2\widehat{D}_{\mathbf{f}}).$$

Therefore, gathering the previous inequalities, we deduce that

$$\begin{aligned} \mathbb{E}[\mathcal{R}(\hat{\mathbf{f}}) - \mathcal{R}(\mathbf{f}^*)] &\leq \mathbb{E} \left[ \max_{\tilde{\mathcal{S}}_n} (D_{\mathbf{f}} - 2\widehat{D}_{\mathbf{f}}) \mathbb{1}_{\mathcal{A}} \right] \\ &\quad + C_K \left( \frac{1}{n} + \exp \left( -\frac{np_0^2}{4} \right) \right). \quad (11) \end{aligned}$$

Therefore to finish the proof it remains to control the first term in the right hand side of Inequality (11). For  $u \geq 0$ , on  $\mathcal{A}$  and conditionally on  $\mathcal{D}_{n_1}$ , it holds that,

$$\begin{aligned} \mathbb{E} \left[ \max_{\tilde{\mathcal{S}}_n} (D_{\mathbf{f}} - 2\widehat{D}_{\mathbf{f}}) \right] &\leq u + \int_u^\infty \mathbb{P} \left( \max_{\tilde{\mathcal{S}}_n} (D_{\mathbf{f}} - 2\widehat{D}_{\mathbf{f}}) \geq t \right) dt. \quad (12) \end{aligned}$$

Let us introduce the least squares function

$$l_{\mathbf{f}}(Z, \mathcal{T}) := \sum_{k=1}^K (Z_k - \mathbf{f}^k(\mathcal{T}))^2.$$

Since for each  $(\mu, \mathbf{h}) \in \tilde{\mathcal{S}}$ ,  $\mathbf{f}_{(\hat{\mathbf{p}}, \mu, \mathbf{h})}$  are uniformly bounded by 1, we get from Bernstein's inequality, conditionally on  $\mathcal{D}_{n_1}$ , for  $t \geq 0$

$$\begin{aligned} \mathbb{P} \left( D_{\mathbf{f}} - 2\widehat{D}_{\mathbf{f}} \geq t \right) &\leq \mathbb{P} \left( 2(D_{\mathbf{f}} - 2\widehat{D}_{\mathbf{f}}) \geq t + D_{\mathbf{f}} \right) \\ &\leq \exp \left( \frac{-n(t + D_{\mathbf{f}})^2/8}{B_{\mathbf{f}} + (t + D_{\mathbf{f}})4K/3} \right), \quad (13) \end{aligned}$$

with

$$B_{\mathbf{f}} := \mathbb{E} \left[ (l_{\mathbf{f}}(Z, \mathcal{T}) - l_{\mathbf{f}^*}(Z, \mathcal{T}))^2 \right].$$

Besides, conditionally on  $\mathcal{D}_{n_1}$ , we have

$$l_{\mathbf{f}}(Z, \mathcal{T}) - l_{\mathbf{f}^*}(Z, \mathcal{T}) \leq C \sum_{k=1}^K (\mathbf{f}^k(\mathcal{T}) - \mathbf{f}^{*k}(\mathcal{T})).$$

Therefore, conditionally on  $\mathcal{D}_{n_1}$ , we deduce from Cauchy-Schwartz Inequality

$$\begin{aligned} \mathbb{E} \left[ (l_{\mathbf{f}}(Z, \mathcal{T}) - l_{\mathbf{f}^*}(Z, \mathcal{T}))^2 \right] &\leq C_K \sum_{k=1}^K \mathbb{E} [(\mathbf{f}^k(\mathcal{T}) - \mathbf{f}^{*k}(\mathcal{T}))^2] \\ &= C_K (\mathcal{R}(\mathbf{f}) - \mathcal{R}(\mathbf{f}^*)). \end{aligned}$$

Thus, writing

$$\begin{aligned} B_{\mathbf{f}} &\leq 2\mathbb{E} \left[ (l_{\mathbf{f}}(Z, \mathcal{T}) - l_{\mathbf{f}^*}(Z, \mathcal{T}))^2 \right] \\ &\quad + 2\mathbb{E} \left[ (l_{\tilde{\mathbf{f}}}(Z, \mathcal{T}) - l_{\mathbf{f}^*}(Z, \mathcal{T}))^2 \right], \end{aligned}$$

we deduce

$$B_{\mathbf{f}} \leq C_K \left( \mathcal{R}(\mathbf{f}) - \mathcal{R}(\mathbf{f}^*) + \mathcal{R}(\tilde{\mathbf{f}}) - \mathcal{R}(\mathbf{f}^*) \right).$$

Then, as  $\mathcal{R}(\mathbf{f}) - \mathcal{R}(\mathbf{f}^*) = \mathcal{R}(\mathbf{f}) - \mathcal{R}(\tilde{\mathbf{f}}) + \mathcal{R}(\tilde{\mathbf{f}}) - \mathcal{R}(\mathbf{f}^*)$ , conditionally on  $\mathcal{D}_{n_1}$  and on the event  $\mathcal{A}$ , we deduce from the above inequality and Equation (8) that

$$B_{\mathbf{f}} \leq C_K (D_{\mathbf{f}} + \Delta_n).$$

Hence, from Inequality (13), we get for  $t \geq \Delta_n$ ,

$$\mathbb{P}\left(D_{\mathbf{f}} - 2\widehat{D}_{\mathbf{f}} \geq t\right) \leq \exp(-C_K nt),$$

which leads to

$$\mathbb{P}\left(\max_{\tilde{\mathcal{S}}_n}(D_{\mathbf{f}} - 2\widehat{D}_{\mathbf{f}}) \geq t\right) \leq \text{card}(\tilde{\mathcal{S}}_n) \exp(-C_K nt).$$

In view of Equation (12), we then obtain that, conditionally on  $\mathcal{D}_{n_1}$ ,

$$\begin{aligned} \mathbb{E}\left[\max_{\tilde{\mathcal{S}}_n}(D_{\mathbf{f}} - 2\widehat{D}_{\mathbf{f}})\mathbb{1}_{\mathcal{A}}\right] &\leq \max\left(\Delta_n, \frac{C_K \log(\tilde{\mathcal{S}}_n)}{n}\right) \\ &\quad + \int_{C_K \log(\tilde{\mathcal{S}}_n)/n}^{+\infty} \exp(-C_K nt) dt. \end{aligned}$$

Finally, integrating the above inequality ,w.r.t.  $\mathcal{D}_{n_1}$ , yields

$$\mathbb{E}\left[\max_{\tilde{\mathcal{S}}_n}(D_{\mathbf{f}} - 2\widehat{D}_{\mathbf{f}})\mathbb{1}_{\mathcal{A}}\right] \leq \frac{C_K \log(\tilde{\mathcal{S}}_n)}{n}.$$

Hence, this inequality combined with Equation (11) give the desired result.

□

## References

DJ Daley and D Vere-Jones. Basic properties of the poisson process. *An Introduction to the Theory of Point Processes: Volume I: Elementary Theory and Methods*, pages 19–40, 2003.
